# Supplementary material for: Isolation and Identification of Long Non-Coding RNAs in Exosomes Derived from the Serum of Colorectal Carcinoma Patients
Source: MDPI journal article supplement (doi:10.3390/biology10090918), 2021-09-15
Supplement: s1 [file s1]

**Table S1.** Normalized gene expression level of lncRNAs for early versus advanced-stage of CRC patients. The *p* values are calculated based on a Student's *t*-test of the replicate 2<sup>Δ</sup> (-ΔΔCt) values for each gene in the early-stage and advanced-stage of CRC patients.

| Position | Gene Symbol | AVG ΔCt        |             | 2 <sup>Δ</sup> -ΔCt |             | Fold Change                |          | <i>p</i> -value | Fold Up- or Down-Regulation |                            |
|----------|-------------|----------------|-------------|---------------------|-------------|----------------------------|----------|-----------------|-----------------------------|----------------------------|
|          |             | Advanced-stage | Early-stage | Advanced-stage      | Early-stage | Early-stage/advanced-stage | Comments |                 | Early stage/advanced-stage  | Early stage/advanced-stage |
| A01      | ACTA2-AS1   | 12.13          | 11.71       | 0.000223            | 0.000297    | 0.75                       | C        | 0.350699        |                             | -1.33                      |
| A02      | ADAMTS9-AS2 | 12.13          | 11.71       | 0.000223            | 0.000298    | 0.75                       | B        | 0.350293        |                             | -1.34                      |
| A03      | AFAP1-AS1   | 12.06          | 11.71       | 0.000233            | 0.000297    | 0.78                       | B        | 0.352468        |                             | -1.27                      |
| A04      | AIRN        | 12.13          | 11.71       | 0.000223            | 0.000297    | 0.75                       | C        | 0.350699        |                             | -1.33                      |
| A05      | BANCR       | 12.13          | 11.71       | 0.000223            | 0.000297    | 0.75                       | C        | 0.350699        |                             | -1.33                      |
| A06      | BCAR4       | 12.13          | 11.71       | 0.000223            | 0.000297    | 0.75                       | C        | 0.350699        |                             | -1.33                      |
| A07      | BLACAT1     | 12.13          | 11.71       | 0.000223            | 0.000297    | 0.75                       | C        | 0.350699        |                             | -1.33                      |
| A08      | CAHM        | 12.13          | 11.71       | 0.000223            | 0.000297    | 0.75                       | C        | 0.350699        |                             | -1.33                      |
| A09      | CBR3-AS1    | 12.13          | 11.71       | 0.000223            | 0.000297    | 0.75                       | C        | 0.350699        |                             | -1.33                      |
| A10      | CCAT1       | 12.13          | 11.71       | 0.000223            | 0.000297    | 0.75                       | C        | 0.350699        |                             | -1.33                      |
| A11      | CCAT2       | 12.11          | 11.71       | 0.000227            | 0.000297    | 0.76                       | B        | 0.352671        |                             | -1.31                      |
| A12      | CDKN2B-AS1  | 12.13          | 11.08       | 0.000223            | 0.000462    | 0.48                       | B        | 0.226005        |                             | -2.07                      |
| B01      | CRNDE       | 11.64          | 11.44       | 0.000314            | 0.000361    | 0.87                       | B        | 0.590460        |                             | -1.15                      |
| B02      | DGCR5       | 12.13          | 11.48       | 0.000223            | 0.000349    | 0.64                       | B        | 0.314541        |                             | -1.56                      |
| B03      | DLEU2       | 11.59          | 10.5        | 0.000325            | 0.00069     | 0.47                       | B        | 0.064086        |                             | -2.12                      |
| B04      | DLX6-AS1    | 12.13          | 11.71       | 0.000223            | 0.000297    | 0.75                       | C        | 0.350699        |                             | -1.33                      |
| B05      | EMX2OS      | 12.13          | 11.71       | 0.000223            | 0.000297    | 0.75                       | C        | 0.350699        |                             | -1.33                      |
| B06      | FTX         | 12.08          | 11.71       | 0.000231            | 0.000297    | 0.78                       | B        | 0.369633        |                             | -1.29                      |
| B07      | GACAT1      | 12.13          | 11.71       | 0.000223            | 0.000297    | 0.75                       | C        | 0.350699        |                             | -1.33                      |
| B08      | GAS5        | 3.71           | 3.95        | 0.076203            | 0.064648    | 1.18                       |          | 0.942845        |                             | 1.18                       |
| B09      | GAS6-AS1    | 12.13          | 11.71       | 0.000223            | 0.000297    | 0.75                       | C        | 0.350699        |                             | -1.33                      |
| B10      | GNAS-AS1    | 12.13          | 11.71       | 0.000223            | 0.000297    | 0.75                       | C        | 0.350699        |                             | -1.33                      |
| B11      | H19         | 3.38           | 7.68        | 0.095789            | 0.004889    | 19.59                      |          | 0.046517        |                             | 19.59                      |
| B12      | HAND2-AS1   | 12.13          | 11.61       | 0.000223            | 0.00032     | 0.7                        | B        | 0.335190        |                             | -1.43                      |
| C01      | HEIH        | 10.1           | 9.73        | 0.000912            | 0.001174    | 0.78                       | B        | 0.572422        |                             | -1.29                      |
| C02      | HIF1A-AS1   | 12.13          | 11.71       | 0.000223            | 0.000297    | 0.75                       | C        | 0.350699        |                             | -1.33                      |
| C03      | HIF1A-AS2   | 12.13          | 11.71       | 0.000223            | 0.000297    | 0.75                       | C        | 0.350699        |                             | -1.33                      |
| C04      | HNF1A-AS1   | 12.13          | 11.52       | 0.000223            | 0.000341    | 0.65                       | B        | 0.322718        |                             | -1.53                      |
| C05      | HOTAIR      | 12.13          | 11.51       | 0.000223            | 0.000343    | 0.65                       | B        | 0.321589        |                             | -1.53                      |
| C06      | HOTAIRM1    | 11.85          | 9.37        | 0.000272            | 0.001509    | 0.18                       | B        | 0.121880        |                             | -5.55                      |
| C07      | HOTTIP      | 12.13          | 11.71       | 0.000223            | 0.000297    | 0.75                       | C        | 0.350699        |                             | -1.33                      |
| C08      | HOXA11-AS   | 12.13          | 11.71       | 0.000223            | 0.000297    | 0.75                       | C        | 0.350699        |                             | -1.33                      |
| C09      | HOXA-AS2    | 12.13          | 11.71       | 0.000223            | 0.000297    | 0.75                       | C        | 0.350699        |                             | -1.33                      |
| C10      | HULC        | 12.13          | 11.71       | 0.000223            | 0.000297    | 0.75                       | C        | 0.350699        |                             | -1.33                      |

|     |             |       |       |          |          |      |   |          |       |
|-----|-------------|-------|-------|----------|----------|------|---|----------|-------|
| C11 | IPW         | 12.13 | 11.22 | 0.000223 | 0.000419 | 0.53 | B | 0.163563 | -1.87 |
| C12 | JADRR       | 12.13 | 11.61 | 0.000223 | 0.000321 | 0.7  | B | 0.338916 | -1.44 |
| D01 | KCNQ1OT1    | 12.13 | 11.18 | 0.000223 | 0.000432 | 0.52 | B | 0.173818 | -1.93 |
| D02 | KRASPI      | 12.13 | 11.71 | 0.000223 | 0.000297 | 0.75 | C | 0.350699 | -1.33 |
| D03 | LINC00152   | 5.29  | 4.1   | 0.02563  | 0.058264 | 0.44 |   | 0.694516 | -2.27 |
| D04 | LINC00261   | 12.13 | 11.43 | 0.000223 | 0.000362 | 0.62 | B | 0.299397 | -1.62 |
| D05 | LINC00312   | 12.13 | 11.43 | 0.000223 | 0.000362 | 0.62 | B | 0.299397 | -1.62 |
| D06 | LINC00538   | 12.13 | 11.71 | 0.000223 | 0.000297 | 0.75 | C | 0.350699 | -1.33 |
| D07 | LINC00887   | 12.13 | 11.71 | 0.000223 | 0.000297 | 0.75 | C | 0.350699 | -1.33 |
| D08 | LINC00963   | 12.13 | 11.54 | 0.000223 | 0.000336 | 0.67 | B | 0.320303 | -1.5  |
| D09 | LINC01233   | 12.13 | 11.71 | 0.000223 | 0.000297 | 0.75 | C | 0.350699 | -1.33 |
| D10 | LINC01234   | 12.13 | 11.71 | 0.000223 | 0.000297 | 0.75 | C | 0.350699 | -1.33 |
| D11 | LSINCT5     | 12.13 | 11.65 | 0.000223 | 0.000311 | 0.72 | B | 0.344617 | -1.39 |
| D12 | LUCAT1      | 12.08 | 11.71 | 0.000231 | 0.000297 | 0.78 | B | 0.360726 | -1.29 |
| E01 | MALAT1      | 12.13 | 11.71 | 0.000223 | 0.000297 | 0.75 | C | 0.350699 | -1.33 |
| E02 | MEG3        | 12.13 | 11.52 | 0.000223 | 0.000342 | 0.65 | B | 0.322439 | -1.53 |
| E03 | MIR155HG    | 11.9  | 11.7  | 0.000262 | 0.000301 | 0.87 | B | 0.660549 | -1.15 |
| E04 | MIR17HG     | 12.13 | 11.71 | 0.000223 | 0.000297 | 0.75 | C | 0.350699 | -1.33 |
| E05 | MIR31HG     | 12.13 | 11.71 | 0.000223 | 0.000298 | 0.75 | B | 0.350498 | -1.33 |
| E06 | MIR7-3HG    | 12.13 | 11.71 | 0.000223 | 0.000297 | 0.75 | C | 0.350699 | -1.33 |
| E07 | MRPL23-AS1  | 12.13 | 11.71 | 0.000223 | 0.000297 | 0.75 | C | 0.350699 | -1.33 |
| E08 | NAMA        | 12.13 | 11.62 | 0.000223 | 0.000317 | 0.7  | B | 0.340966 | -1.42 |
| E09 | NBR2        | 11.85 | 11.57 | 0.000272 | 0.000328 | 0.83 | B | 0.671969 | -1.21 |
| E10 | NEAT1       | 9.78  | 8.86  | 0.001141 | 0.002147 | 0.53 | B | 0.842517 | -1.88 |
| E11 | NRON        | 12.13 | 11.71 | 0.000223 | 0.000297 | 0.75 | C | 0.350699 | -1.33 |
| E12 | PANDAR      | 12.13 | 11.71 | 0.000223 | 0.000297 | 0.75 | C | 0.350699 | -1.33 |
| F01 | PCA3        | 12.13 | 11.71 | 0.000223 | 0.000297 | 0.75 | C | 0.350699 | -1.33 |
| F02 | PCAT1       | 12.13 | 11.71 | 0.000223 | 0.000297 | 0.75 | C | 0.350699 | -1.33 |
| F03 | PCGEM1      | 12.13 | 11.71 | 0.000223 | 0.000297 | 0.75 | C | 0.350699 | -1.33 |
| F04 | POU5F1P5    | 12.13 | 11.71 | 0.000223 | 0.000297 | 0.75 | C | 0.350699 | -1.33 |
| F05 | PRNCR1      | 11.84 | 11.27 | 0.000273 | 0.000406 | 0.67 | B | 0.290353 | -1.49 |
| F06 | PTCSC1      | 12.13 | 11.71 | 0.000223 | 0.000297 | 0.75 | C | 0.350699 | -1.33 |
| F07 | PTCSC3      | 12.13 | 11.57 | 0.000223 | 0.00033  | 0.68 | B | 0.332392 | -1.48 |
| F08 | PTENP1      | 11.99 | 11.71 | 0.000245 | 0.000297 | 0.82 | B | 0.393893 | -1.21 |
| F09 | PVT1        | 11.9  | 10.77 | 0.000261 | 0.000575 | 0.45 | B | 0.182207 | -2.2  |
| F10 | RMRP        | 8.6   | 8.08  | 0.002572 | 0.003699 | 0.7  |   | 0.225709 | -1.44 |
| F11 | RMST        | 12.13 | 11.71 | 0.000223 | 0.000297 | 0.75 | C | 0.350699 | -1.33 |
| F12 | RPS6KA2-AS1 | 12.13 | 11.71 | 0.000223 | 0.000297 | 0.75 | C | 0.350699 | -1.33 |
| G01 | SNHG16      | 9.68  | 8.98  | 0.001218 | 0.001977 | 0.62 | B | 0.899145 | -1.62 |
| G02 | SPRY4-IT1   | 12.13 | 11.71 | 0.000223 | 0.000297 | 0.75 | C | 0.350699 | -1.33 |
| G03 | SUMO1P3     | 12.13 | 11.71 | 0.000223 | 0.000297 | 0.75 | C | 0.350699 | -1.33 |
| G04 | TERC        | 12.13 | 11.6  | 0.000223 | 0.000322 | 0.69 | B | 0.338378 | -1.44 |
| G05 | TRERNA1     | 12.13 | 11.57 | 0.000223 | 0.000329 | 0.68 | B | 0.303832 | -1.47 |

|     |        |       |       |          |          |      |   |          |       |
|-----|--------|-------|-------|----------|----------|------|---|----------|-------|
| G06 | TSIX   | 12.13 | 11.71 | 0.000223 | 0.000297 | 0.75 | C | 0.350699 | -1.33 |
| G07 | TUG1   | 11.67 | 10.09 | 0.000308 | 0.00092  | 0.33 |   | 0.025613 | -2.99 |
| G08 | TUSC7  | 12.13 | 11.71 | 0.000223 | 0.000297 | 0.75 | C | 0.350699 | -1.33 |
| G09 | UCA1   | 12.13 | 11.13 | 0.000223 | 0.000447 | 0.5  | B | 0.131656 | -2    |
| G10 | WT1-AS | 12.13 | 11.59 | 0.000223 | 0.000325 | 0.69 | B | 0.335924 | -1.46 |
| G11 | XIST   | 12.11 | 11.7  | 0.000227 | 0.000301 | 0.75 | B | 0.356766 | -1.33 |
| G12 | ZFAS1  | 5.87  | 4.9   | 0.017122 | 0.033464 | 0.51 |   | 0.855877 | -1.95 |

**Table S2.** Normalized gene expression level of lncRNAs for non-cancer individuals versus CRC patients. The p values are calculated based on a Student's *t*-test of the replicate 2<sup>Δ</sup> (- Delta Ct) values for each gene in the non-cancer group and CRC groups.

| Position | Gene Symbol | AVG ΔC <sub>t</sub> |            | 2 <sup>Δ</sup> ΔC <sub>t</sub> |            | Fold Change     |          | p-value         | Fold Up-or Down-Regulation |
|----------|-------------|---------------------|------------|--------------------------------|------------|-----------------|----------|-----------------|----------------------------|
|          |             | CRC                 | Non-cancer | CRC                            | Non-cancer | CRC /non-cancer | Comments | CRC /non-cancer | CRC /non-cancer            |
| A01      | ACTA2-AS1   | 11.94               | 10.82      | 0.000254                       | 0.000552   | 0.46            | C        | 0.054175        | -2.18                      |
| A02      | ADAMTS9-AS2 | 11.94               | 10.81      | 0.000254                       | 0.000556   | 0.46            | B        | 0.052259        | -2.19                      |
| A03      | AFAP1-AS1   | 11.91               | 10.75      | 0.00026                        | 0.000579   | 0.45            | B        | 0.053479        | -2.23                      |
| A04      | AIRN        | 11.94               | 10.76      | 0.000254                       | 0.000578   | 0.44            | B        | 0.057746        | -2.28                      |
| A05      | BANCR       | 11.94               | 10.82      | 0.000254                       | 0.000552   | 0.46            | C        | 0.054175        | -2.18                      |
| A06      | BCAR4       | 11.94               | 10.71      | 0.000254                       | 0.000597   | 0.42            | B        | 0.061246        | -2.35                      |
| A07      | BLACAT1     | 11.94               | 10.77      | 0.000254                       | 0.000574   | 0.44            |          | 0.041756        | -2.26                      |
| A08      | CAHM        | 11.94               | 10.7       | 0.000254                       | 0.000603   | 0.42            |          | 0.034852        | -2.38                      |
| A09      | CBR3-AS1    | 11.94               | 10.82      | 0.000254                       | 0.000552   | 0.46            | C        | 0.054175        | -2.18                      |
| A10      | CCAT1       | 11.94               | 10.82      | 0.000254                       | 0.000552   | 0.46            | C        | 0.054175        | -2.18                      |
| A11      | CCAT2       | 11.93               | 10.82      | 0.000256                       | 0.000554   | 0.46            | B        | 0.054127        | -2.17                      |
| A12      | CDKN2B-AS1  | 11.66               | 10.82      | 0.000309                       | 0.000552   | 0.56            | B        | 0.667772        | -1.79                      |
| B01      | CRNDE       | 11.55               | 10.67      | 0.000334                       | 0.000616   | 0.54            | B        | 0.889903        | -1.84                      |
| B02      | DGCR5       | 11.84               | 10.82      | 0.000273                       | 0.000552   | 0.49            | B        | 0.057720        | -2.03                      |
| B03      | DLEU2       | 11.1                | 9.66       | 0.000454                       | 0.001239   | 0.37            | B        | 0.118556        | -2.73                      |
| B04      | DLX6-AS1    | 11.94               | 10.82      | 0.000254                       | 0.000552   | 0.46            | C        | 0.054175        | -2.18                      |
| B05      | EMX2OS      | 11.94               | 10.8       | 0.000254                       | 0.000561   | 0.45            | B        | 0.053222        | -2.21                      |
| B06      | FTX         | 11.92               | 10.38      | 0.000258                       | 0.000751   | 0.34            | B        | 0.200192        | -2.91                      |
| B07      | GACAT1      | 11.94               | 10.8       | 0.000254                       | 0.000559   | 0.45            | B        | 0.053289        | -2.2                       |
| B08      | GAS5        | 3.82                | 2.23       | 0.070833                       | 0.212526   | 0.33            |          | 0.103149        | -3                         |
| B09      | GAS6-AS1    | 11.94               | 10.81      | 0.000254                       | 0.000556   | 0.46            | B        | 0.051232        | -2.19                      |
| B10      | GNAS-AS1    | 11.94               | 10.82      | 0.000254                       | 0.000552   | 0.46            | C        | 0.054175        | -2.18                      |
| B11      | H19         | 5.29                | 3.92       | 0.02553                        | 0.065889   | 0.39            |          | 0.921921        | -2.58                      |
| B12      | HAND2-AS1   | 11.9                | 10.82      | 0.000262                       | 0.000552   | 0.47            | B        | 0.055638        | -2.11                      |
| C01      | HEIH        | 9.94                | 7.97       | 0.001021                       | 0.003978   | 0.26            | B        | 0.772519        | -3.9                       |
| C02      | HIF1A-AS1   | 11.94               | 9.43       | 0.000254                       | 0.001452   | 0.17            | B        | 0.361454        | -5.72                      |
| C03      | HIF1A-AS2   | 11.94               | 10.82      | 0.000254                       | 0.000552   | 0.46            | C        | 0.054175        | -2.18                      |
| C04      | HNFI1A-AS1  | 11.86               | 10.76      | 0.00027                        | 0.000576   | 0.47            | B        | 0.053025        | -2.14                      |
| C05      | HOTAIR      | 11.85               | 10.71      | 0.00027                        | 0.000598   | 0.45            |          | 0.044996        | -2.21                      |

|     |             |       |       |          |          |      |   |          |       |
|-----|-------------|-------|-------|----------|----------|------|---|----------|-------|
| C06 | HOTAIRM1    | 10.75 | 10.11 | 0.000582 | 0.000905 | 0.64 | B | 0.730295 | -1.56 |
| C07 | HOTTIP      | 11.94 | 10.73 | 0.000254 | 0.000588 | 0.43 | B | 0.055283 | -2.32 |
| C08 | HOXA11-AS   | 11.94 | 10.82 | 0.000254 | 0.000552 | 0.46 | C | 0.054175 | -2.18 |
| C09 | HOXA-AS2    | 11.94 | 10.82 | 0.000254 | 0.000552 | 0.46 | C | 0.054175 | -2.18 |
| C10 | HULC        | 11.94 | 10.78 | 0.000254 | 0.000567 | 0.45 | B | 0.050711 | -2.24 |
| C11 | IPW         | 11.73 | 9.82  | 0.000295 | 0.001107 | 0.27 | B | 0.109129 | -3.75 |
| C12 | JADRR       | 11.9  | 10.76 | 0.000262 | 0.000575 | 0.46 |   | 0.047305 | -2.19 |
| D01 | KCNQ1OT1    | 11.71 | 10.82 | 0.000299 | 0.000552 | 0.54 | B | 0.090097 | -1.85 |
| D02 | KRAS P1     | 11.94 | 10.82 | 0.000254 | 0.000552 | 0.46 | C | 0.054175 | -2.18 |
| D03 | LINC00152   | 4.76  | 3.07  | 0.03692  | 0.11908  | 0.31 |   | 0.040188 | -3.23 |
| D04 | LINC00261   | 11.82 | 10.74 | 0.000277 | 0.000584 | 0.47 |   | 0.048652 | -2.11 |
| D05 | LINC00312   | 11.82 | 10.81 | 0.000277 | 0.000559 | 0.5  | B | 0.058608 | -2.02 |
| D06 | LINC00538   | 11.94 | 10.71 | 0.000254 | 0.000596 | 0.43 | B | 0.054117 | -2.35 |
| D07 | LINC00887   | 11.94 | 10.8  | 0.000254 | 0.00056  | 0.45 | B | 0.053868 | -2.21 |
| D08 | LINC00963   | 11.87 | 9.97  | 0.000268 | 0.001    | 0.27 | B | 0.172212 | -3.73 |
| D09 | LINC01233   | 11.94 | 10.82 | 0.000254 | 0.000552 | 0.46 | C | 0.054175 | -2.18 |
| D10 | LINC01234   | 11.94 | 10.82 | 0.000254 | 0.000552 | 0.46 | C | 0.054175 | -2.18 |
| D11 | LSINCT5     | 11.92 | 10.81 | 0.000259 | 0.000556 | 0.47 | B | 0.054068 | -2.15 |
| D12 | LUCAT1      | 11.92 | 10.78 | 0.000259 | 0.00057  | 0.45 | B | 0.051017 | -2.2  |
| E01 | MALAT1      | 11.94 | 10.8  | 0.000254 | 0.000563 | 0.45 | B | 0.055227 | -2.22 |
| E02 | MEG3        | 11.86 | 10.82 | 0.00027  | 0.000552 | 0.49 | B | 0.056877 | -2.05 |
| E03 | MIR155HG    | 11.81 | 10.7  | 0.000279 | 0.000601 | 0.46 | B | 0.101757 | -2.16 |
| E04 | MIR17HG     | 11.94 | 10.82 | 0.000254 | 0.000552 | 0.46 | C | 0.054175 | -2.18 |
| E05 | MIR31HG     | 11.94 | 10.77 | 0.000254 | 0.000572 | 0.44 | B | 0.053014 | -2.25 |
| E06 | MIR7-3HG    | 11.94 | 9.66  | 0.000254 | 0.001239 | 0.2  | B | 0.361451 | -4.88 |
| E07 | MRPL23-AS1  | 11.94 | 10.82 | 0.000254 | 0.000552 | 0.46 | C | 0.054175 | -2.18 |
| E08 | NAMA        | 11.9  | 10.81 | 0.000261 | 0.000556 | 0.47 | B | 0.052384 | -2.13 |
| E09 | NBR2        | 11.72 | 9.92  | 0.000296 | 0.001035 | 0.29 | B | 0.075069 | -3.5  |
| E10 | NEAT1       | 9.37  | 7.87  | 0.001511 | 0.004273 | 0.35 | B | 0.252364 | -2.83 |
| E11 | NRON        | 11.94 | 10.82 | 0.000254 | 0.000552 | 0.46 | C | 0.054175 | -2.18 |
| E12 | PANDAR      | 11.94 | 10.82 | 0.000254 | 0.000553 | 0.46 | B | 0.053701 | -2.18 |
| F01 | PCA3        | 11.94 | 10.81 | 0.000254 | 0.000557 | 0.46 | B | 0.050573 | -2.2  |
| F02 | PCAT1       | 11.94 | 10.82 | 0.000254 | 0.000552 | 0.46 | C | 0.054175 | -2.18 |
| F03 | PCGEM1      | 11.94 | 10.82 | 0.000254 | 0.000552 | 0.46 | C | 0.054175 | -2.18 |
| F04 | POU5F1P5    | 11.94 | 10.65 | 0.000254 | 0.000623 | 0.41 | B | 0.051159 | -2.46 |
| F05 | PRNCR1      | 11.58 | 9.86  | 0.000326 | 0.001074 | 0.3  | B | 0.072399 | -3.3  |
| F06 | PTCSC1      | 11.94 | 10.8  | 0.000254 | 0.000559 | 0.45 | B | 0.052811 | -2.2  |
| F07 | PTCSC3      | 11.88 | 10.75 | 0.000266 | 0.000582 | 0.46 | B | 0.079524 | -2.19 |
| F08 | PTENP1      | 11.87 | 10.8  | 0.000267 | 0.000559 | 0.48 | B | 0.058380 | -2.09 |
| F09 | PVT1        | 11.4  | 9.42  | 0.000371 | 0.001459 | 0.25 | B | 0.325096 | -3.94 |
| F10 | RMRP        | 8.37  | 7.15  | 0.003023 | 0.007046 | 0.43 |   | 0.246914 | -2.33 |
| F11 | RMST        | 11.94 | 10.7  | 0.000254 | 0.000599 | 0.42 |   | 0.037760 | -2.36 |
| F12 | RPS6KA2-AS1 | 11.94 | 10.82 | 0.000254 | 0.000552 | 0.46 | C | 0.054175 | -2.18 |

|     |           |       |       |          |          |      |   |          |       |
|-----|-----------|-------|-------|----------|----------|------|---|----------|-------|
| G01 | SNHG16    | 9.37  | 6.36  | 0.001511 | 0.012182 | 0.12 | A | 0.085807 | -8.06 |
| G02 | SPRY4-IT1 | 11.94 | 10.82 | 0.000254 | 0.000552 | 0.46 | C | 0.054175 | -2.18 |
| G03 | SUMO1P3   | 11.94 | 10.78 | 0.000254 | 0.000568 | 0.45 |   | 0.046959 | -2.24 |
| G04 | TERC      | 11.89 | 10.78 | 0.000263 | 0.000568 | 0.46 |   | 0.047714 | -2.16 |
| G05 | TRERNA1   | 11.88 | 10.8  | 0.000265 | 0.00056  | 0.47 | B | 0.058883 | -2.11 |
| G06 | TSIX      | 11.94 | 10.81 | 0.000254 | 0.000555 | 0.46 | B | 0.053604 | -2.19 |
| G07 | TUG1      | 10.96 | 9.5   | 0.0005   | 0.001379 | 0.36 | B | 0.184977 | -2.76 |
| G08 | TUSC7     | 11.94 | 10.82 | 0.000254 | 0.000552 | 0.46 | C | 0.054175 | -2.18 |
| G09 | UCA1      | 11.68 | 10.64 | 0.000304 | 0.000628 | 0.48 | B | 0.075796 | -2.06 |
| G10 | WT1-AS    | 11.89 | 10.82 | 0.000264 | 0.000555 | 0.48 | B | 0.053505 | -2.1  |
| G11 | XIST      | 11.93 | 10.77 | 0.000257 | 0.000573 | 0.45 | B | 0.050035 | -2.23 |
| G12 | ZFAS1     | 5.44  | 3.08  | 0.023062 | 0.118062 | 0.2  |   | 0.094430 | -5.12 |

### Supplementary Figures

Western blot analysis of ALIX/PDCD6IP from exosomes derived from SW480-7 and total cell lysates of SW480-7. A series of blot images were captured with camera exposure times ranging from 1 minute to 5 minutes.

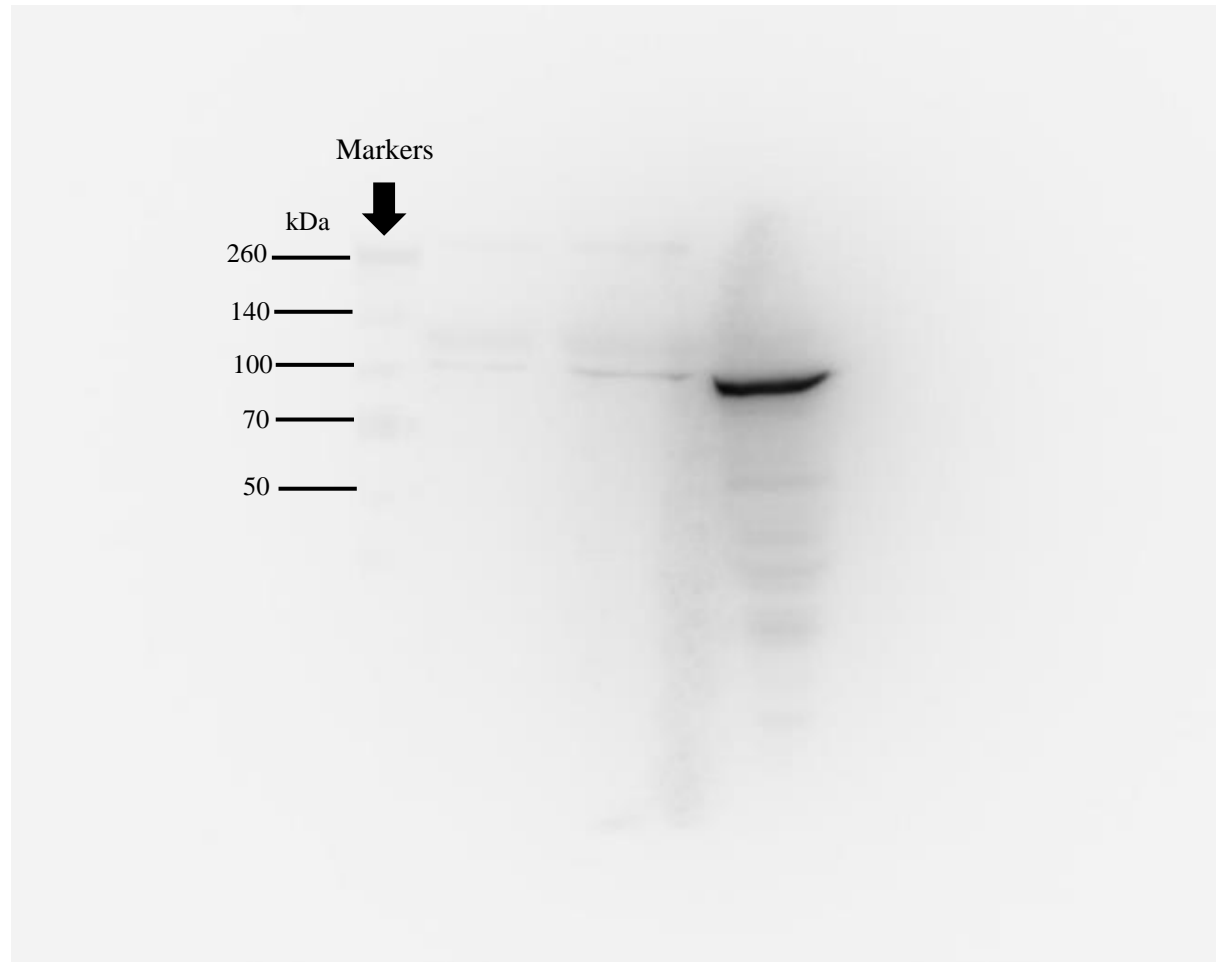

**Figure S1a.** Western blot analysis of ALIX/PDCD6IP from exosomes derived from SW480-7 and total cell lysates of SW480-7. The chemiluminescence image was captured at 1 minute exposure time.

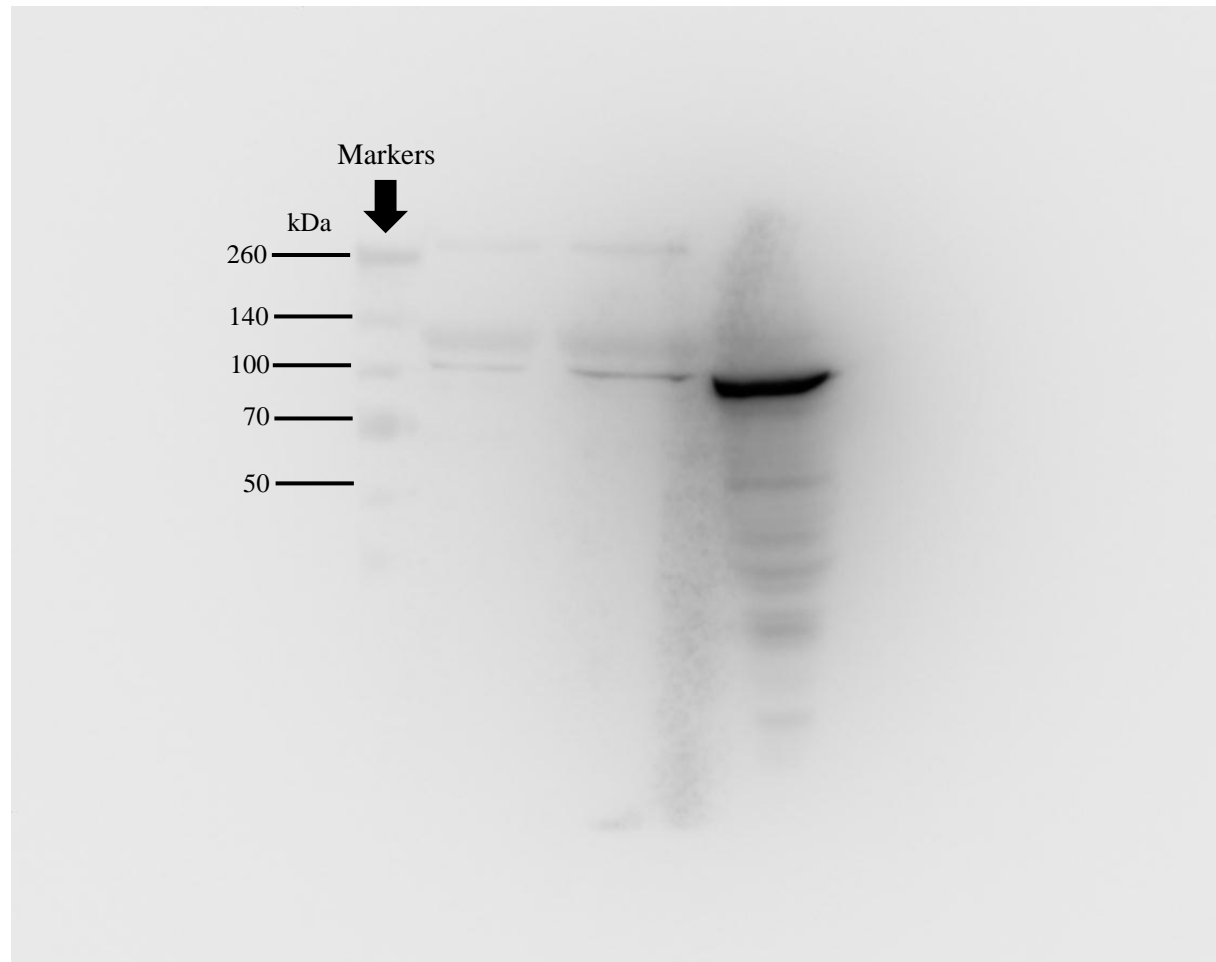

**Figure S1b.** Western blot analysis of ALIX/PDCD6IP from exosomes derived from SW480-7 and total cell lysates of SW480-7. The chemiluminescence image was captured at 2 minute exposure time.

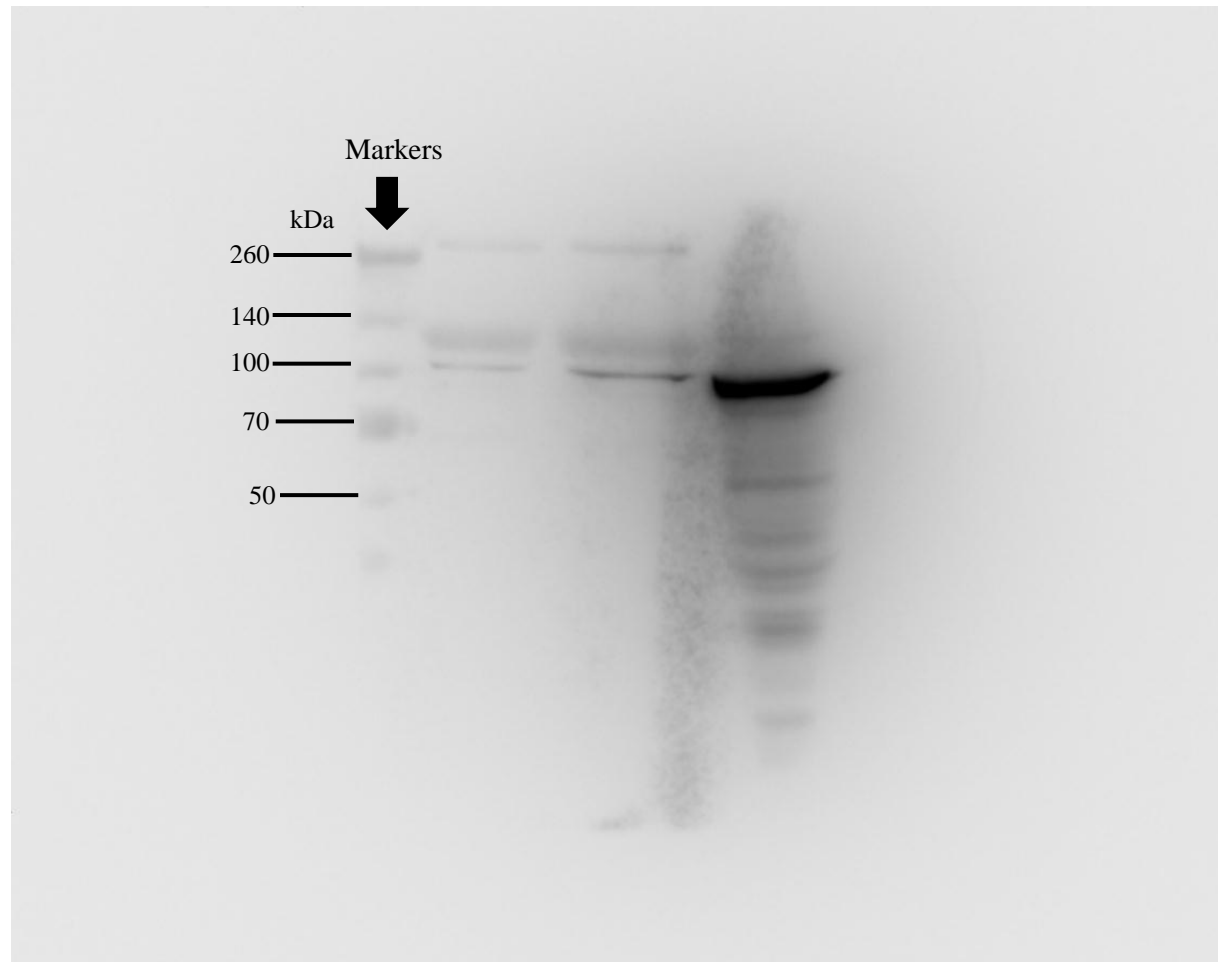

**Figure S1c.** Western blot analysis of ALIX/PDCD6IP from exosomes derived from SW480-7 and total cell lysates of SW480-7. The chemiluminescence image was captured at 3 minute exposure time.



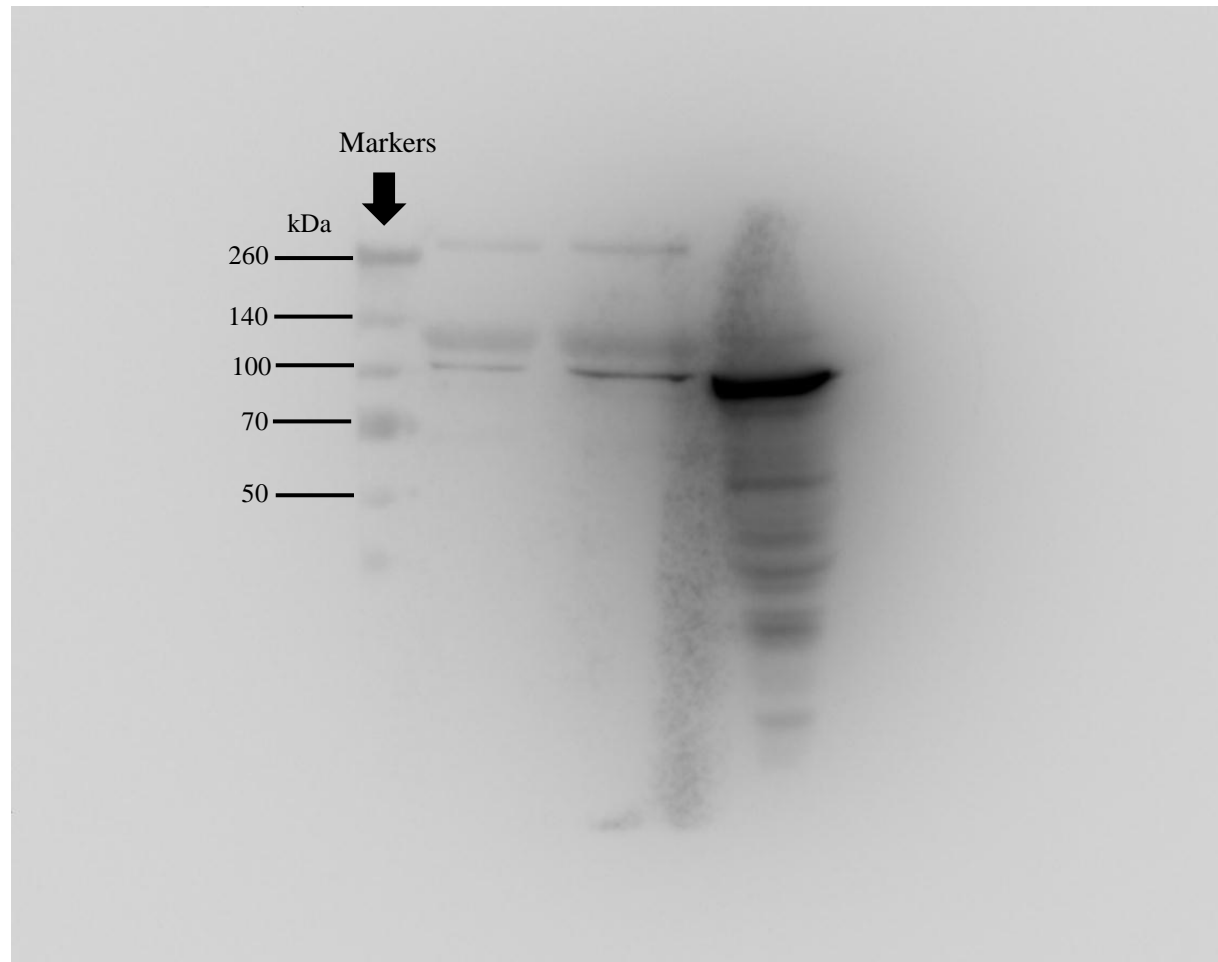

**Figure S1d.** Western blot analysis of ALIX/PDCD6IP from exosomes derived from SW480-7 and total cell lysates of SW480-7. The chemiluminescence image was captured at 4 minute exposure time.

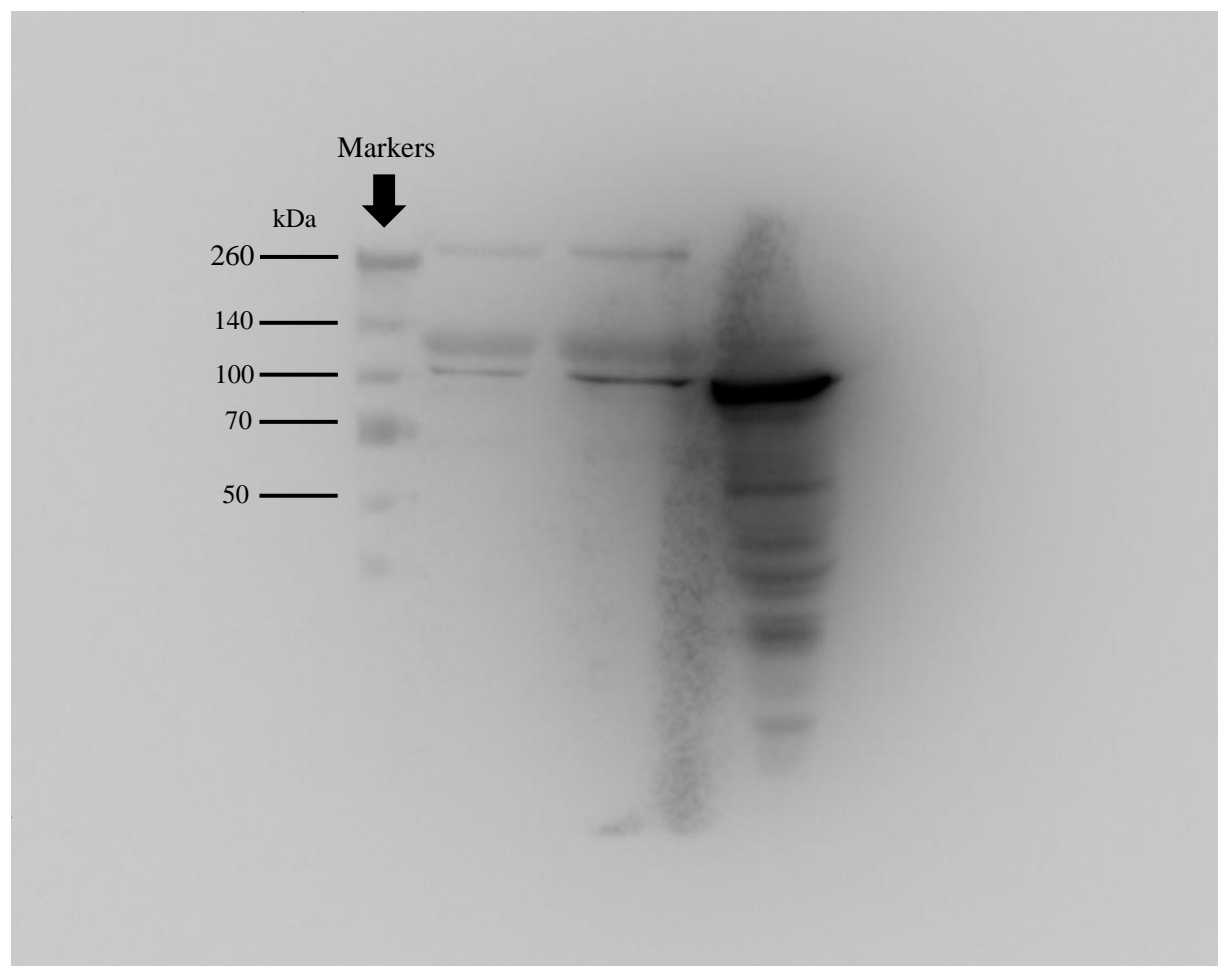

**Figure S1e.** Western blot analysis of ALIX/PDCD6IP from exosomes derived from SW480-7 and total cell lysates of SW480-7. The chemiluminescence image was captured at 5 minute exposure time.
